# Supplementary material for: Covalent surface modification with electron-donating/accepting π-conjugated chains to effectively tune the electronic and magnetic properties of zigzag SiC nanoribbons
Source: Royal Society of Chemistry journal article supplement (doi:10.1039/c6tc05005k), 2017-01-01
Supplement: c6tc05005k1.pdf [file c6tc05005k1.pdf]

# Electronic Supplementary Information

## Covalent Surface Modification by the Electron-Donating/Accepting $\pi$ -Conjugated Chain to Effectively Tune the Electronic and Magnetic Properties of Zigzag SiC Nanoribbons

Xiaopeng Shen, Guangtao Yu\*, Zengsong Zhang, Jingwei Liu, Hui Li, Xuri  
Huang, Wei Chen\*

*Laboratory of Theoretical and Computational Chemistry, Institute of Theoretical  
Chemistry, Jilin University, Changchun 130023, People's Republic of China*

\*To whom correspondence should be addressed. Email: [yugt@jlu.edu.cn](mailto:yugt@jlu.edu.cn) (G.Y.),  
[w\\_chen@jlu.edu.cn](mailto:w_chen@jlu.edu.cn) (W.C.)

**(I) zSiCNR-Si1-(CH=CH)<sub>n</sub>-NH<sub>2</sub> and zSiCNR-Si3-(CH=CH)<sub>n</sub>-NH<sub>2</sub> (n=2, 3, 4 and 6)**

**Table S1** The relative energies ( $\Delta E$ ) of different magnetic couplings to the ground state, magnetic moment of the ground state ( $M_{\text{tot}}$ ), the formation energies ( $E_f$ ), the electronic properties, the gap in the minority channel, and the charge of the substrate zSiCNR for the zSiCNR-Si1-(CH=CH)<sub>n</sub>-NH<sub>2</sub> and zSiCNR-Si3-(CH=CH)<sub>n</sub>-NH<sub>2</sub> (n=2, 3, 4 and 6) series. The NM, FM and AFM represent the nonmagnetic, ferromagnetic and antiferromagnetic spin couplings, respectively.

| Systems                                          | $\Delta E(\text{meV})$ |      |     | $M_{\text{tot}}$<br>( $\mu_B$ ) | $E_f$<br>(eV) | Electronic<br>properties | The gap in<br>minority<br>channel(eV) | Charge<br>of zSiCNR<br>( e ) |
|--------------------------------------------------|------------------------|------|-----|---------------------------------|---------------|--------------------------|---------------------------------------|------------------------------|
|                                                  | NM                     | FM   | AFM |                                 |               |                          |                                       |                              |
| zSiCNR-Si1-(CH=CH) <sub>1</sub> -NH <sub>2</sub> | 110.0                  | 0.0* | --  | 1.000                           | -4.067        | Half-metallicity         | 1.190                                 | 0.592                        |
| zSiCNR-Si1-(CH=CH) <sub>2</sub> -NH <sub>2</sub> | 129.6                  | 0.0* | --  | 1.000                           | -4.036        | Half-metallicity         | 1.246                                 | 0.608                        |
| zSiCNR-Si1-(CH=CH) <sub>3</sub> -NH <sub>2</sub> | 124.9                  | 0.0* | --  | 1.000                           | -4.021        | Half-metallicity         | 1.250                                 | 0.613                        |
| zSiCNR-Si1-(CH=CH) <sub>4</sub> -NH <sub>2</sub> | 117.2                  | 0.0* | --  | 1.000                           | -4.007        | Half-metallicity         | 1.253                                 | 0.609                        |
| zSiCNR-Si1-(CH=CH) <sub>6</sub> -NH <sub>2</sub> | 117.1                  | 0.0* | --  | 1.000                           | -4.023        | Half-metallicity         | 1.102                                 | 0.618                        |
| zSiCNR-Si3-(CH=CH) <sub>1</sub> -NH <sub>2</sub> | 189.4                  | 21.5 | 0.0 | 1.000                           | -2.078        | Half-metallicity         | 0.344                                 | 0.566                        |
| zSiCNR-Si3-(CH=CH) <sub>2</sub> -NH <sub>2</sub> | 207.5                  | 2.4  | 0.0 | 1.000                           | -2.089        | Half-metallicity         | 0.350                                 | 0.504                        |
| zSiCNR-Si3-(CH=CH) <sub>3</sub> -NH <sub>2</sub> | 173.6                  | 1.7  | 0.0 | 1.000                           | -2.091        | Half-metallicity         | 0.344                                 | 0.518                        |
| zSiCNR-Si3-(CH=CH) <sub>4</sub> -NH <sub>2</sub> | 173.7                  | 2.6  | 0.0 | 1.000                           | -2.099        | Half-metallicity         | 0.340                                 | 0.507                        |
| zSiCNR-Si3-(CH=CH) <sub>6</sub> -NH <sub>2</sub> | 177.1                  | 1.3  | 0.0 | 1.000                           | -2.100        | Half-metallicity         | 0.331                                 | 0.470                        |

\* represents C( $\uparrow$ )Si(0) spin coupling, where  $\uparrow$  and 0 mean the spin-up and zero local magnetic moments, respectively.

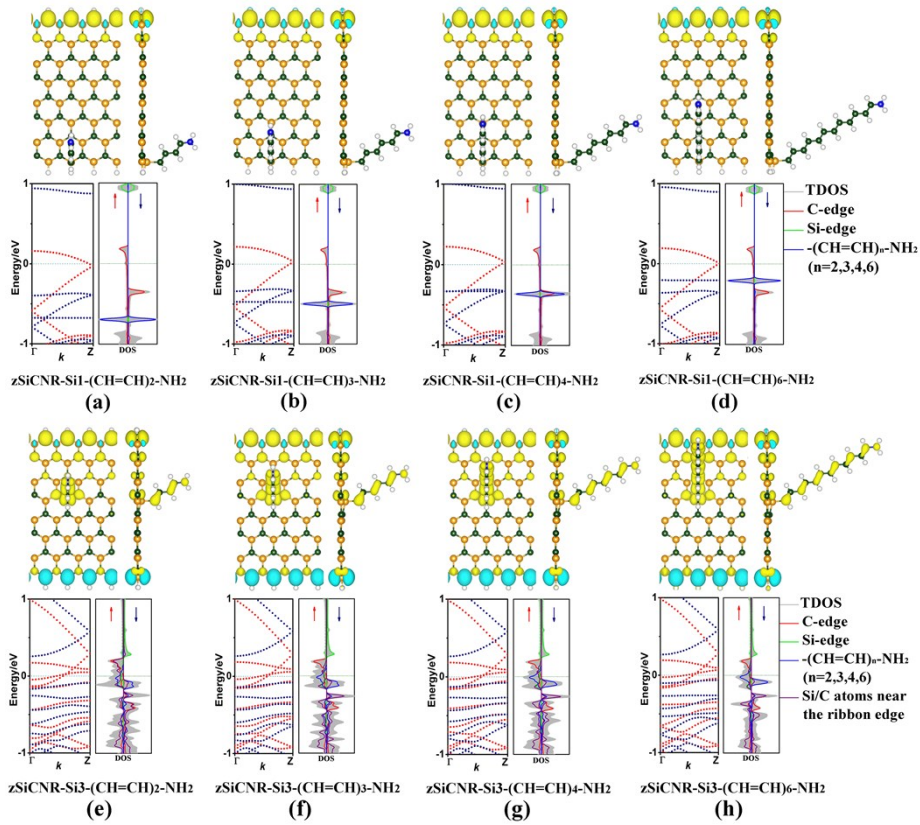

**Figure S1.** The geometry, band structure and corresponding DOS: (a) ~ (d) for  $z\text{SiCNR-Si1}-(\text{CH}=\text{CH})_n-\text{NH}_2$  and (e) ~ (h) for  $z\text{SiCNR-Si3}-(\text{CH}=\text{CH})_n-\text{NH}_2$  ( $n=2, 3, 4, 6$ ). The yellow and blue colors in the geometrical structures represent the spin-up and spin-down orientations of the unpaired electrons, respectively. The red and blue dotted lines in the band structures denote the spin-up ( $\uparrow$ ) and spin-down ( $\downarrow$ ) channels, respectively. The Fermi-level is set as zero and indicated by the green dotted line. Note that for the substrate  $z\text{SiCNR}$ , four units are included in the used supercell.

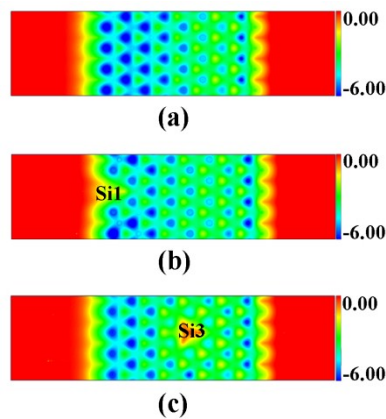

**Figure S2.** The distribution of electrostatic potential in the nanoribbon plane for (a) the pristine 8- $z\text{SiCNR}$ , (b)  $z\text{SiCNR-Si1}-(\text{CH}=\text{CH})_6-\text{NH}_2$ , and (c)  $z\text{SiCNR-Si3}-(\text{CH}=\text{CH})_6-\text{NH}_2$ . Note that the used cross section to the plot of electrostatic potential lies near the SiC nanoribbon surface with a distance of ca.  $0.2 \text{ \AA}$  between them.

**(II) zSiCNR-Si1-(CH=CH)<sub>n</sub>-NO<sub>2</sub> and zSiCNR-Si3-(CH=CH)<sub>n</sub>-NO<sub>2</sub> (n=2, 3, 4 and 6)**

**Table S2** The relative energies ( $\Delta E$ ) of different magnetic couplings to the ground state, magnetic moment of the ground state ( $M_{\text{tot}}$ ), the formation energies ( $E_f$ ), the electronic properties, the gap in the minority channel, and the charge of the substrate zSiCNR for the zSiCNR-Si1-(CH=CH)<sub>n</sub>-NO<sub>2</sub> and zSiCNR-Si3-(CH=CH)<sub>n</sub>-NO<sub>2</sub> (n=2, 3, 4 and 6) series. The NM, FM and AFM represent the nonmagnetic, ferromagnetic and antiferromagnetic spin couplings, respectively.

| Systems                                          | $\Delta E(\text{meV})$ |      |     | $M_{\text{tot}}$<br>( $\mu_B$ ) | $E_f$<br>(eV) | Electronic<br>properties | The gap in<br>minority<br>channel(eV) | Charge<br>of zSiCNR<br>( e ) |
|--------------------------------------------------|------------------------|------|-----|---------------------------------|---------------|--------------------------|---------------------------------------|------------------------------|
|                                                  | NM                     | FM   | AFM |                                 |               |                          |                                       |                              |
| zSiCNR-Si1-(CH=CH) <sub>1</sub> -NO <sub>2</sub> | 101.6                  | 0.0* | --  | 1.000                           | -3.966        | Half-metallicity         | 0.693                                 | 0.695                        |
| zSiCNR-Si1-(CH=CH) <sub>2</sub> -NO <sub>2</sub> | 112.3                  | 0.0* | --  | 1.000                           | -3.912        | Half-metallicity         | 0.620                                 | 0.704                        |
| zSiCNR-Si1-(CH=CH) <sub>3</sub> -NO <sub>2</sub> | 114.5                  | 0.0* | --  | 1.000                           | -3.940        | Half-metallicity         | 0.605                                 | 0.672                        |
| zSiCNR-Si1-(CH=CH) <sub>4</sub> -NO <sub>2</sub> | 108.8                  | 0.0* | --  | 1.000                           | -3.954        | Half-metallicity         | 0.590                                 | 0.663                        |
| zSiCNR-Si1-(CH=CH) <sub>6</sub> -NO <sub>2</sub> | 110.3                  | 0.0* | --  | 1.000                           | -3.943        | Half-metallicity         | 0.556                                 | 0.656                        |
| zSiCNR-Si3-(CH=CH) <sub>1</sub> -NO <sub>2</sub> | 198.1                  | 2.3  | 0.0 | 1.000                           | -2.183        | Half-metallicity         | 0.400                                 | 0.735                        |
| zSiCNR-Si3-(CH=CH) <sub>2</sub> -NO <sub>2</sub> | 177.8                  | 2.6  | 0.0 | 1.000                           | -2.161        | Half-metallicity         | 0.400                                 | 0.727                        |
| zSiCNR-Si3-(CH=CH) <sub>3</sub> -NO <sub>2</sub> | 200.7                  | 14.7 | 0.0 | 1.000                           | -2.179        | Half-metallicity         | 0.400                                 | 0.708                        |
| zSiCNR-Si3-(CH=CH) <sub>4</sub> -NO <sub>2</sub> | 188.0                  | 1.9  | 0.0 | 1.000                           | -2.170        | Half-metallicity         | 0.384                                 | 0.704                        |
| zSiCNR-Si3-(CH=CH) <sub>6</sub> -NO <sub>2</sub> | 187.0                  | 1.0  | 0.0 | 1.000                           | -2.138        | Half-metallicity         | 0.357                                 | 0.691                        |

\* represents C( $\uparrow$ )Si(0) spin coupling, where  $\uparrow$  and 0 mean the spin-up and zero local magnetic moments, respectively.

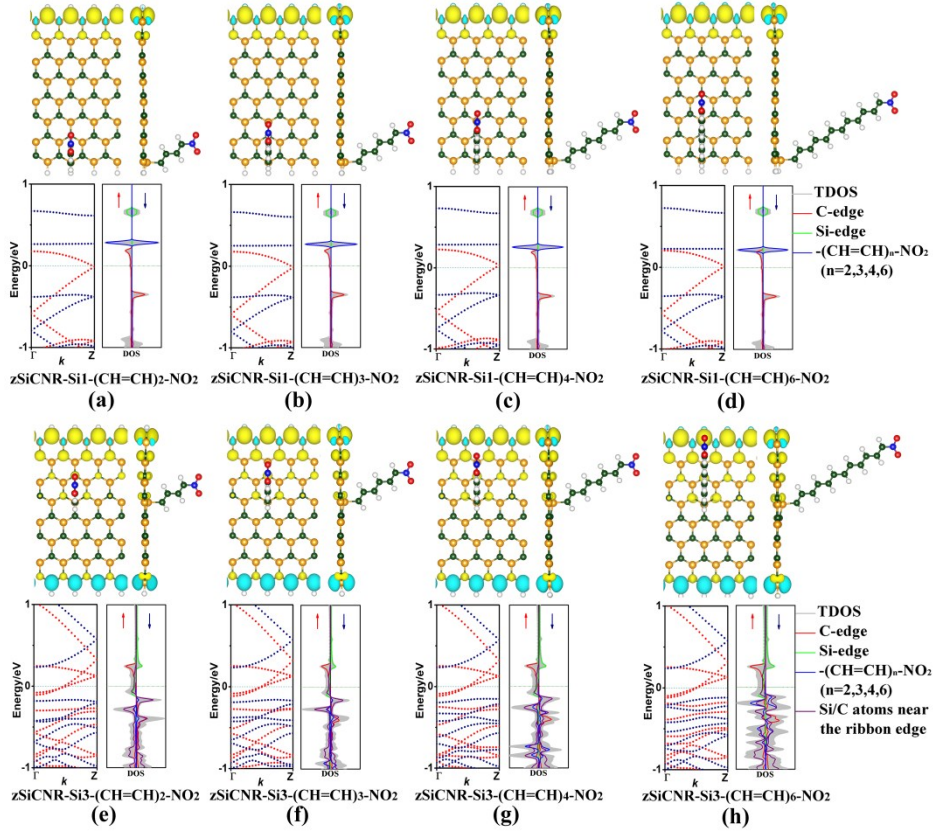

**Figure S3.** The geometry, band structure and corresponding DOS: (a) ~ (d) for  $z\text{SiCNR-Si1}-(\text{CH}=\text{CH})_n-\text{NO}_2$  and (e) ~ (h) for  $z\text{SiCNR-Si3}-(\text{CH}=\text{CH})_n-\text{NO}_2$  ( $n=2, 3, 4, 6$ ). The yellow and blue colors in the geometrical structures represent the spin-up and spin-down orientations of the unpaired electrons, respectively. The red and blue dotted lines in the band structures denote the spin-up ( $\uparrow$ ) and spin-down ( $\downarrow$ ) channels, respectively. The Fermi-level is set as zero and indicated by the green dotted line. Note that for the substrate  $z\text{SiCNR}$ , four units are included in the used supercell.

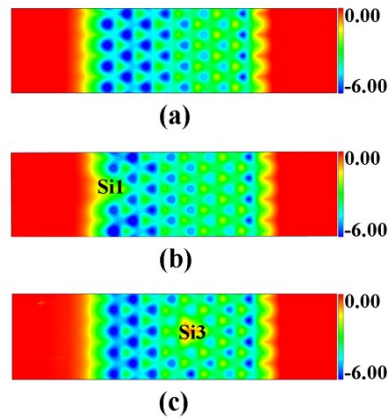

**Figure S4.** The distribution of electrostatic potential in the nanoribbon plane for (a) the pristine 8- $z\text{SiCNR}$ , (b)  $z\text{SiCNR-Si1}-(\text{CH}=\text{CH})_6-\text{NO}_2$ , and (c)  $z\text{SiCNR-Si3}-(\text{CH}=\text{CH})_6-\text{NO}_2$ . Note that the used cross section to the plot of electrostatic potential lies near the SiC nanoribbon surface with a distance of ca.  $0.2 \text{ \AA}$  between them.

(III) The modified zSiCNR systems with the direct adsorption of NH<sub>2</sub> or NO<sub>2</sub> groups at the Si1/Si3 sites (denoted by zSiCNR-Sim-NH<sub>2</sub> or zSiCNR-Sim-NO<sub>2</sub> (m=1, 3)).

**Table S3** The relative energies ( $\Delta E$ ) of different magnetic couplings to the ground state, magnetic moment of the ground state ( $M_{\text{tot}}$ ), the formation energies ( $E_f$ ), the electronic property, the band gap in the minority channel of the ground state and the charge of zSiCNR for zSiCNR-Sim-NH<sub>2</sub>, zSiCNR-Sim-NO<sub>2</sub> (m=1, 3). The NM, FM and AFM here represent the nonmagnetic, ferromagnetic and antiferromagnetic spin couplings, respectively.

| Systems                    | $\Delta E(\text{meV})$ |      |     | $M_{\text{tot}}$<br>( $\mu_B$ ) | $E_f$<br>(eV) | Electronic<br>properties | The gap in<br>minority<br>channel(eV) | Charge<br>of zSiCNR<br>( e ) |
|----------------------------|------------------------|------|-----|---------------------------------|---------------|--------------------------|---------------------------------------|------------------------------|
|                            | NM                     | FM   | AFM |                                 |               |                          |                                       |                              |
| zSiCNR-Si1-NH <sub>2</sub> | 105.3                  | 0.0* | --  | 1.000                           | -4.267        | Half-metallicity         | 1.136                                 | 0.708                        |
| zSiCNR-Si3-NH <sub>2</sub> | 182.6                  | 1.5  | 0.0 | 1.000                           | -2.348        | Half-metallicity         | 0.332                                 | 0.696                        |
| zSiCNR-Si1-NO <sub>2</sub> | 105.0                  | 0.0* | --  | 1.000                           | -2.702        | Half-metallicity         | 0.937                                 | 0.800                        |
| zSiCNR-Si3-NO <sub>2</sub> | 195.9                  | 1.0  | 0.0 | 1.000                           | -1.051        | Half-metallicity         | 0.400                                 | 0.848                        |

\* represent the C( $\uparrow$ )Si(0) spin couplings.  $\uparrow$  and 0 mean the spin-up and zero local magnetic moment.

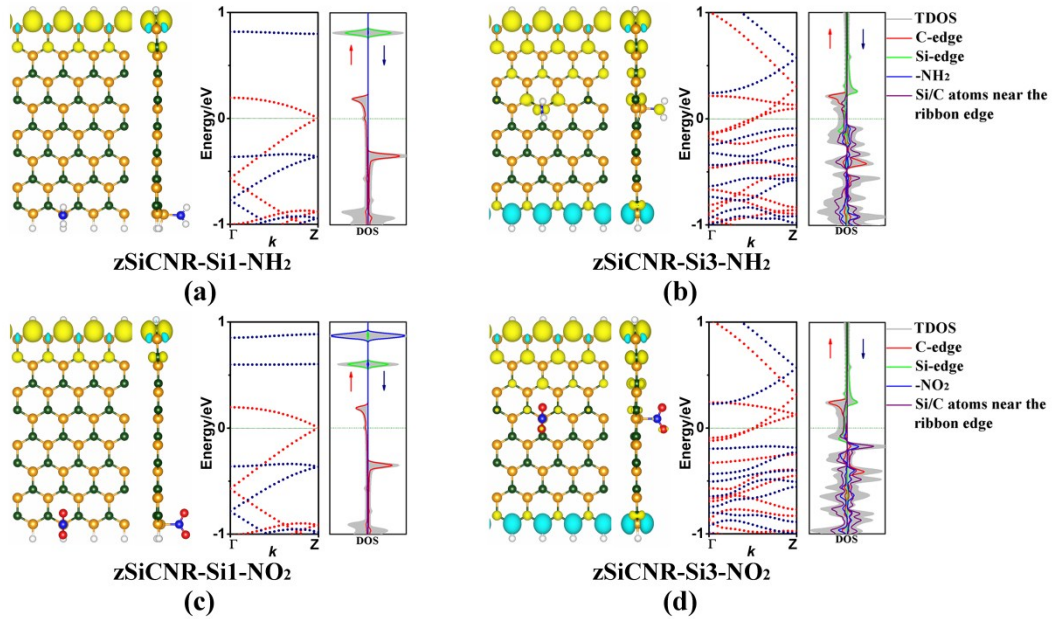

**Figure S5.** The geometry, spin density distribution, band structure and corresponding DOS: (a), (b) for zSiCNR-Sim-NH<sub>2</sub> and (c), (d) for zSiCNR-Sim-NO<sub>2</sub> (m=1, 3). The yellow and blue colors in the geometrical structures represent the spin-up and spin-down orientations of the unpaired electrons, respectively. The red and blue dotted lines in the band structures denote the spin-up ( $\uparrow$ ) and spin-down ( $\downarrow$ ) channels, respectively. The Fermi-level is set as zero and indicated by the green dotted line. Note that for the substrate zSiCNR, four units are included in the used supercell.

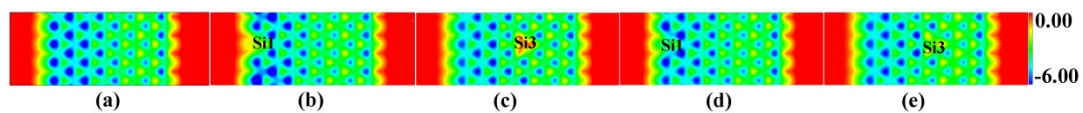

**Figure S6** The distribution of electrostatic potential in the nanoribbon plane: (a) for the pristine 8-zSiCNR, (b), (c) for zSiCNR-Sim-NH<sub>2</sub> and (d), (e) for zSiCNR-Sim-NO<sub>2</sub> (m=1, 3). Note that the used cross section to the plot of electrostatic potential lies near the SiC nanoribbon surface with a distance of ca. 0.2 Å between them.

(IV) The linking of the  $\pi$ -conjugated  $-(\text{CH}=\text{CH})_1\text{-NH}_2$  and  $-(\text{CH}=\text{CH})_1\text{-NO}_2$

**chains at the Si1 and Si3 sites of 8-zSiCNR(u) (denoted by zSiCNR(u)-Sim-(CH=CH)<sub>1</sub>-NH<sub>2</sub> and zSiCNR(u)-Sim-(CH=CH)<sub>1</sub>-NO<sub>2</sub> (m=1, 3; u= 5, 6), and u means that the number of the included units in the supercell for the substrate zSiCNR).**

In this section, we performed the correlative computations to investigate the effect of the concentration of adsorbed  $\pi$ -conjugated chain on the electronic and magnetic properties of modified zSiCNR systems by linking the  $-(\text{CH}=\text{CH})_1\text{-NH}_2$  or  $-(\text{CH}=\text{CH})_1\text{-NO}_2$  chain at the representative edge Si1 and inner Si3 sites. We can understand that when increasing the number of the included unit of substrate zSiCNR in the supercell, the concentration of adsorbed  $\pi$ -conjugated chain is reduced for the composite systems. Here, we sampled the more five and six units included in the supercell for the substrate zSiCNR. For convenience, all these modified systems are named as zSiCNR(u)-Sim-(CH=CH)<sub>1</sub>-NH<sub>2</sub> and zSiCNR(u)-Sim-(CH=CH)<sub>1</sub>-NO<sub>2</sub> (m=1, 3; u= 5, 6), in which u represents the number of the included units in the supercell for the substrate zSiCNR.

Our computed results reveal that when unit number of substrate zSiCNR is increased from original four to five units, the sole FM half-metallic behaviors can be maintained in the modified zSiCNR systems by  $-(\text{CH}=\text{CH})_1\text{-NH}_2$  at the Si1 site, where the unpaired spin mainly distributes at the C edge and the unpaired spin of Si edge is still inhibited (Figure S7a). When further increasing the unit number to six for the substrate zSiCNR, the half-metallic behavior can be still sustained in the modified zSiCNR systems by  $-(\text{CH}=\text{CH})_1\text{-NH}_2$  at the Si1 site, yet the FM ground state is converted into the AFM state, where the unpaired spin of C edge is still kept and the that of Si edge is partially recovered (Figure S7e). Their computed DOS results reveal that the C edge dominates the half-metallicity in zSiCNR(5)-Si1-(CH=CH)<sub>1</sub>-NH<sub>2</sub>, while the half-metallic behavior in zSiCNR(6)-Si1-(CH=CH)<sub>1</sub>-NH<sub>2</sub> can be determined by not only the C edge but also the Si edge of zSiCNR (Figures S7a and S7e). Comparatively, when increasing the unit number from original four to five to even six units, the sole AFM half-metallic behavior can be uniformly maintained in the modified zSiCNR systems by  $-(\text{CH}=\text{CH})_1\text{-NH}_2$  at the Si3 site. The computed DOS



results show that the edge Si atoms, the related C atoms at the side of C edge and the conjugated chain are mainly responsible for the half-metallicities in zSiCNR(5)-Si3-(CH=CH)<sub>1</sub>-NH<sub>2</sub> and zSiCNR(6)-Si3-(CH=CH)<sub>1</sub>-NH<sub>2</sub> (Figures S7c and S7g).

The similar situation can be also observed in the modified zSiCNR systems by (CH=CH)<sub>1</sub>-NO<sub>2</sub> at the Si1/Si3 sites. Specifically, our computed results reveal that when increasing the unit number *u* from four to five to six, the half-metallic behavior can be kept in the zSiCNR(*u*)-Si1-(CH=CH)<sub>1</sub>-NO<sub>2</sub> series, accompanied by the conversion for the FM to AFM states (Figures S7b and S7f). Additionally, the sole AFM half-metallic behavior can be also sustained in the zSiCNR(*u*)-Si3-(CH=CH)<sub>1</sub>-NO<sub>2</sub> series (Figures S7d and S7h). Our computed results show that the Si edge and the related C atoms at the side of the C edge are mainly responsible for the half-metallicities for all these four systems including zSiCNR(5)-Si1-(CH=CH)<sub>1</sub>-NO<sub>2</sub>, zSiCNR(6)-Si1-(CH=CH)<sub>1</sub>-NO<sub>2</sub>, zSiCNR(5)-Si3-(CH=CH)<sub>1</sub>-NO<sub>2</sub> and zSiCNR(6)-Si3-(CH=CH)<sub>1</sub>-NO<sub>2</sub>, as illustrated in Figure S7.

Obviously, along with the reduction of the concentration of  $\pi$ -conjugated chain, the magnetic degeneracy of zSiCNR can be still broken, which is also owing to the change of electrostatic potential in the ribbon plane resulted from the occurrence of the electron transfer (0.541 ~0.757 |e|) between the substrate zSiCNR and the conjugated chain (Figure S8 and Table S4). In these modified zSiCNR systems, the sole FM or AFM half-metallicity can be also achieved, where the large semiconducting gaps in minority channel with ranging from 0.367 to 0.531 eV can be observed (Table S4), indicating their considerably robust half-metallic behaviors.

**Table S4** The relative energies ( $\Delta E$ ) of different magnetic couplings to the ground

state, magnetic moment of the ground state ( $M_{\text{tot}}$ ), the formation energies ( $E_f$ ), the electronic property, the band gap in the minority channel of the ground state and the charge of zSiCNR for zSiCNR(u)-Sim-(CH=CH)<sub>1</sub>-NH<sub>2</sub> and zSiCNR(u)-Sim-(CH=CH)<sub>1</sub>-NO<sub>2</sub> (m=1, 3; u=5, 6). The NM, FM and AFM here represent the nonmagnetic, ferromagnetic and antiferromagnetic spin couplings, respectively.

| Systems                                             | $\Delta E(\text{meV})$ |      |     | $M_{\text{tot}}$<br>( $\mu_B$ ) | $E_f$<br>(eV) | Electronic<br>properties | The gap in<br>minority<br>channel(eV) | Charge<br>of zSiCNR<br>( e ) |
|-----------------------------------------------------|------------------------|------|-----|---------------------------------|---------------|--------------------------|---------------------------------------|------------------------------|
|                                                     | NM                     | FM   | AFM |                                 |               |                          |                                       |                              |
| zSiCNR(5)-Si1-(CH=CH) <sub>1</sub> -NH <sub>2</sub> | 92.8                   | 0.0* | --  | 1.000                           | -4.030        | Half-metallicity         | 0.375                                 | 0.585                        |
| zSiCNR(5)-Si3-(CH=CH) <sub>1</sub> -NH <sub>2</sub> | 222.3                  | 1.3  | 0.0 | 1.000                           | -2.112        | Half-metallicity         | 0.367                                 | 0.541                        |
| zSiCNR(5)-Si1-(CH=CH) <sub>1</sub> -NO <sub>2</sub> | 103.0                  | 59.0 | 0.0 | 1.000                           | -3.896        | Half-metallicity         | 0.378                                 | 0.725                        |
| zSiCNR(5)-Si3-(CH=CH) <sub>1</sub> -NO <sub>2</sub> | 239.4                  | 30.3 | 0.0 | 1.000                           | -2.271        | Half-metallicity         | 0.465                                 | 0.717                        |
| zSiCNR(6)-Si1-(CH=CH) <sub>1</sub> -NH <sub>2</sub> | 144.4                  | 32.7 | 0.0 | 1.000                           | -4.009        | Half-metallicity         | 0.531                                 | 0.591                        |
| zSiCNR(6)-Si3-(CH=CH) <sub>1</sub> -NH <sub>2</sub> | 261.4                  | 8.7  | 0.0 | 1.000                           | -2.171        | Half-metallicity         | 0.384                                 | 0.556                        |
| zSiCNR(6)-Si1-(CH=CH) <sub>1</sub> -NO <sub>2</sub> | 153.7                  | 32.0 | 0.0 | 1.000                           | -3.918        | Half-metallicity         | 0.463                                 | 0.739                        |
| zSiCNR(6)-Si3-(CH=CH) <sub>1</sub> -NO <sub>2</sub> | 298.2                  | 30.7 | 0.0 | 1.000                           | -2.301        | Half-metallicity         | 0.496                                 | 0.757                        |

\* represent the C( $\uparrow$ )Si(0) spin couplings.  $\uparrow$  and 0 mean the spin-up and zero local magnetic moment.

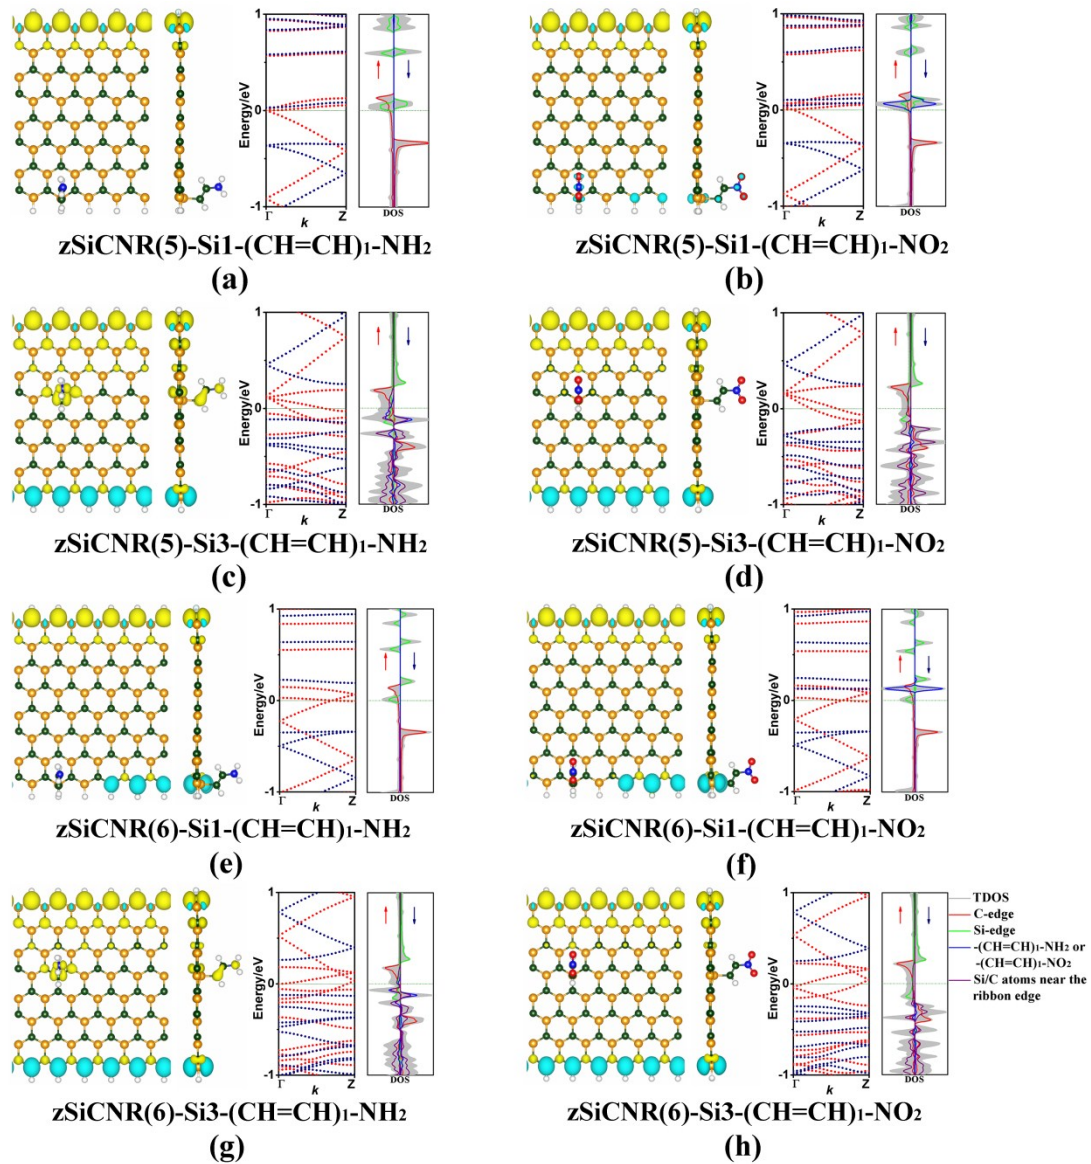

**Figure S7** The geometry, spin density distribution, band structure and corresponding DOS for  $z\text{SiCNR}(u)\text{-Sim}-(\text{CH}=\text{CH})_1\text{-NH}_2$  and  $z\text{SiCNR}(u)\text{-Sim}-(\text{CH}=\text{CH})_1\text{-NO}_2$  ( $m=1, 3$ ;  $u=5, 6$ ). The yellow and blue colors in the geometrical structures represent the spin-up and spin-down orientations of the unpaired electrons, respectively. The red and blue dotted lines in the band structures denote the spin-up ( $\uparrow$ ) and spin-down ( $\downarrow$ ) channels, respectively. The Fermi-level is set as zero and indicated by the green dotted line.

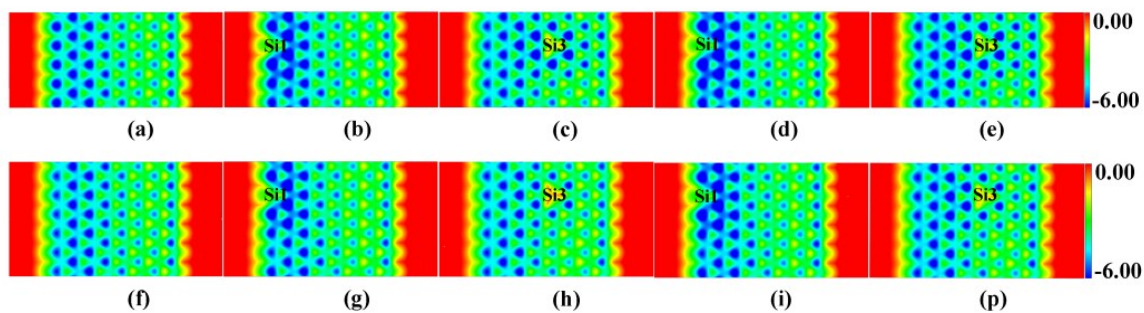

**Figure S8** The distribution of electrostatic potential in the nanoribbon plane: (a) and (f) for the pristine 8-zSiCNR(u) ( $u=5, 6$ ) as well as (b)~(e) and (g)~(p) for zSiCNR(u)-Sim-(CH=CH)<sub>1</sub>-NH<sub>2</sub> and zSiCNR(u)-Sim-(CH=CH)<sub>1</sub>-NO<sub>2</sub> ( $m=1, 3$ ;  $u=5, 6$ ). Note that the used cross section to the plot of electrostatic potential lies near the SiC nanoribbon surface with a distance of ca. 0.2 Å between them.
